# Supplementary material
Source: Springer Nature journal article supplement (https://www.springermedizin.de/resource/supplementary/12985_2007_404_MOESM5_ESM.pdf/9608006)

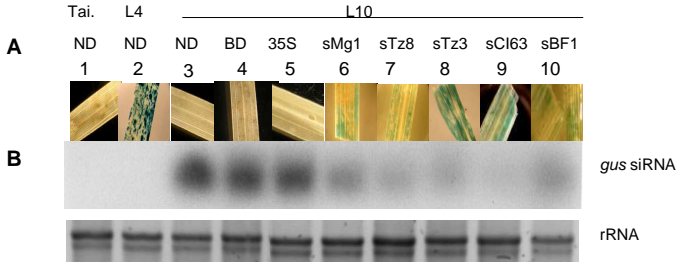

Supplement: MOESM5 [file 9608006]
